# Supplementary material
Source: HighWire-hosted journal article supplement (https://bjgpopen.org/highwire/filestream/5220/field_highwire_adjunct_files/0/Lowe_BJGPO.2021.0227_Supp.pdf)
Supplement: Lowe_BJGPO.2021.0227_Supp.pdf [file Lowe_BJGPO.2021.0227_Supp.pdf]

## Supplementary Files

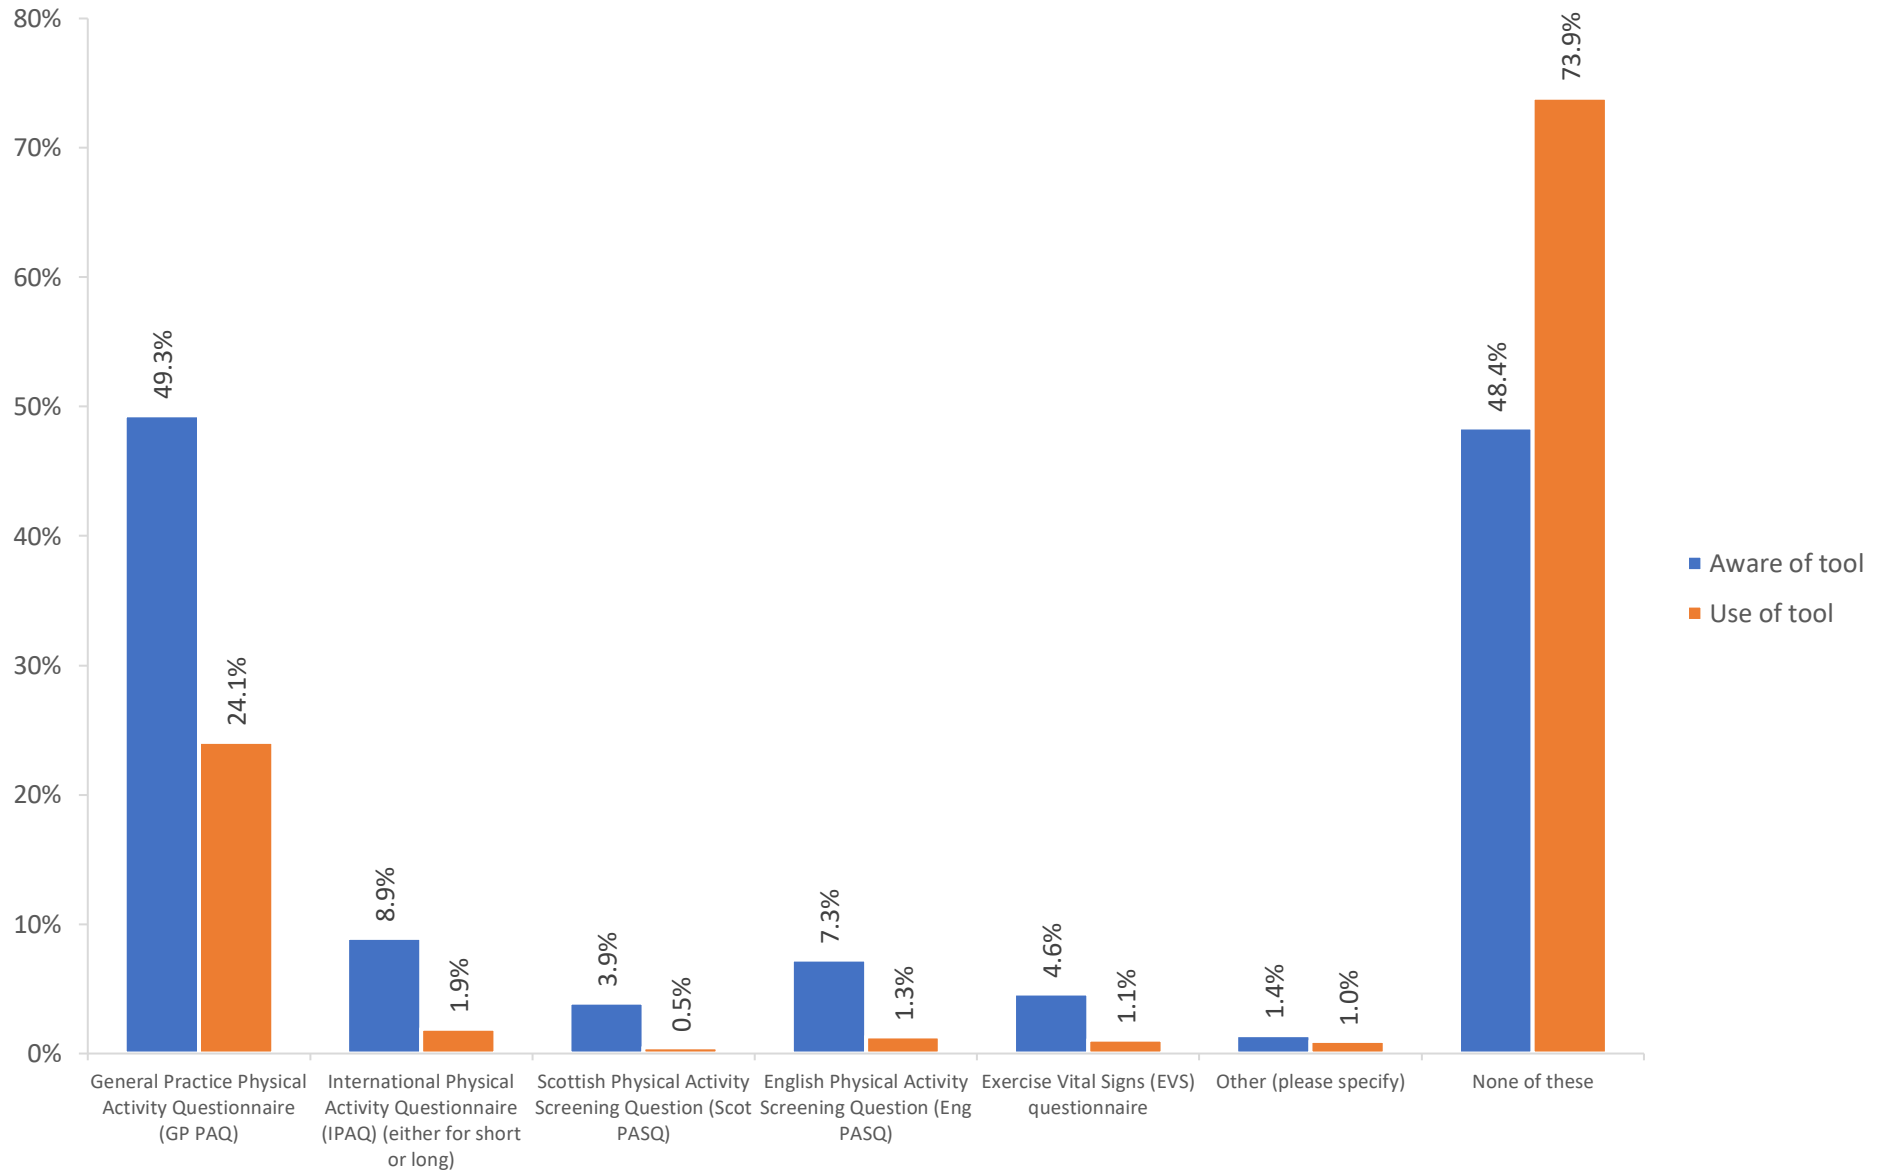

**Figure S1. GPs awareness and use of tools used to assess PA.**

**Survey question: Which of the following tools, to help assess patient physical activity, are you aware of and which do you use?**

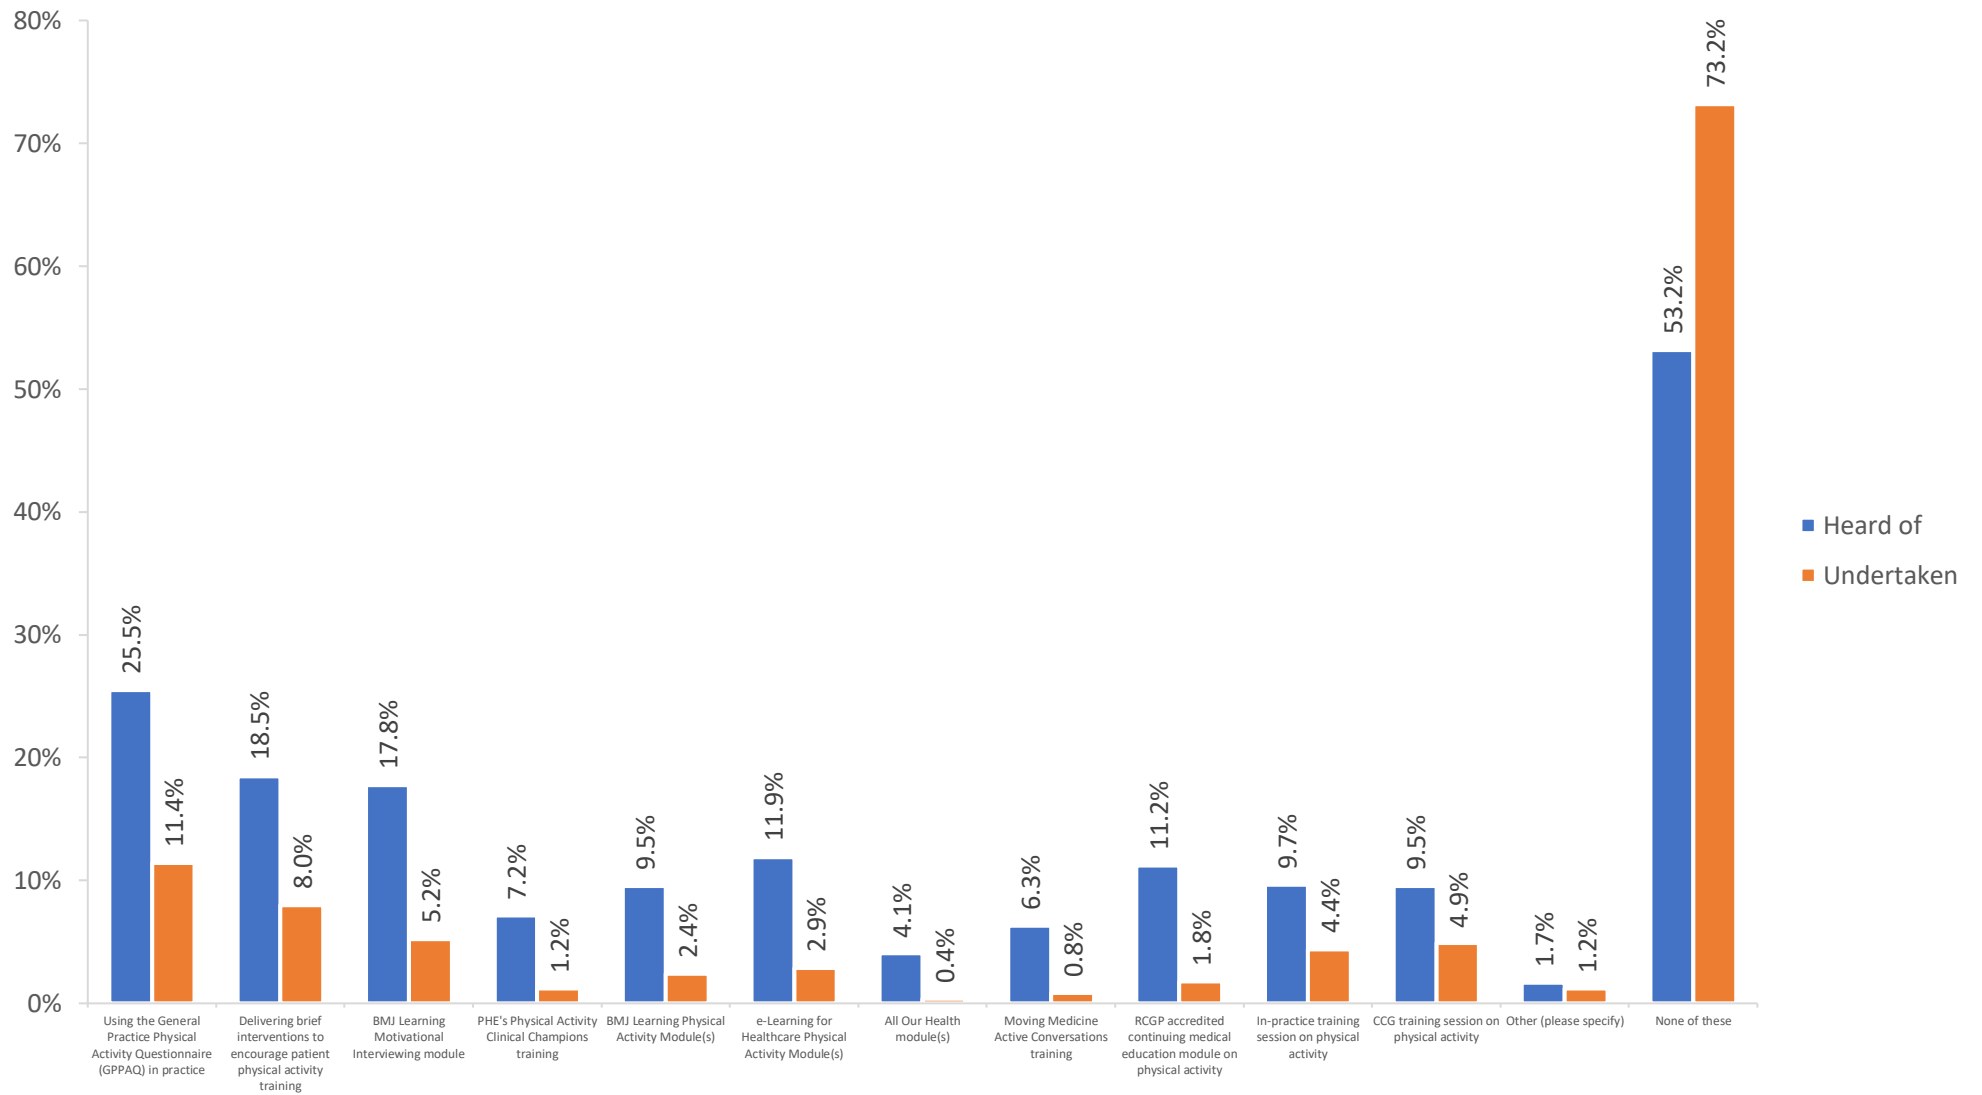

**Figure S2. GPs knowledge of and engagement with PA training.**

**Survey question: Which, if any, of the following training sessions or e-learning modules have you heard of or undertaken with respect to encouraging physical activity?**

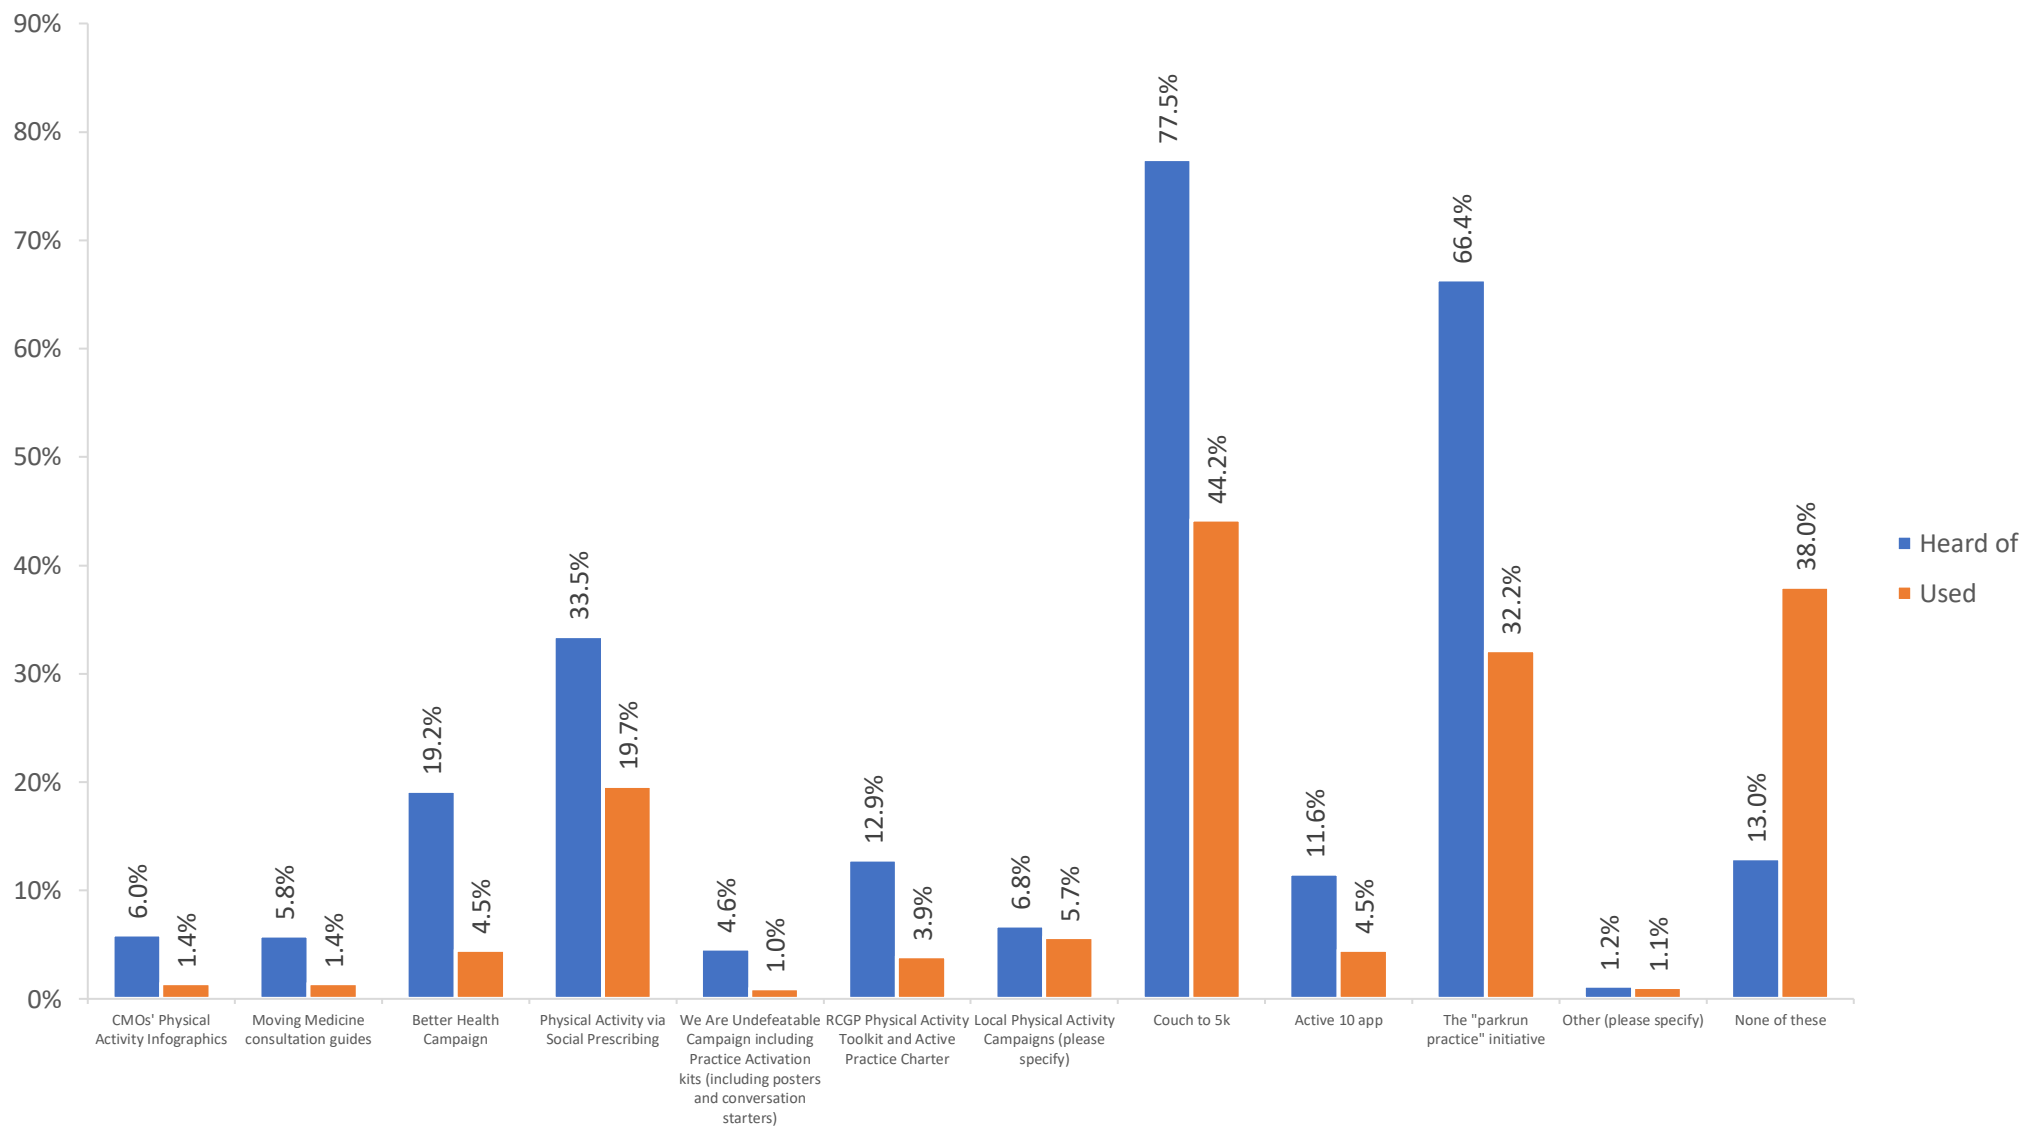

**Figure S3. GPs knowledge of and engagement with PA campaigns and support tools.**

**Survey question: Which, if any, of the following physical activity campaigns and support tools have you heard of or used to inspire or support patients to get active?**

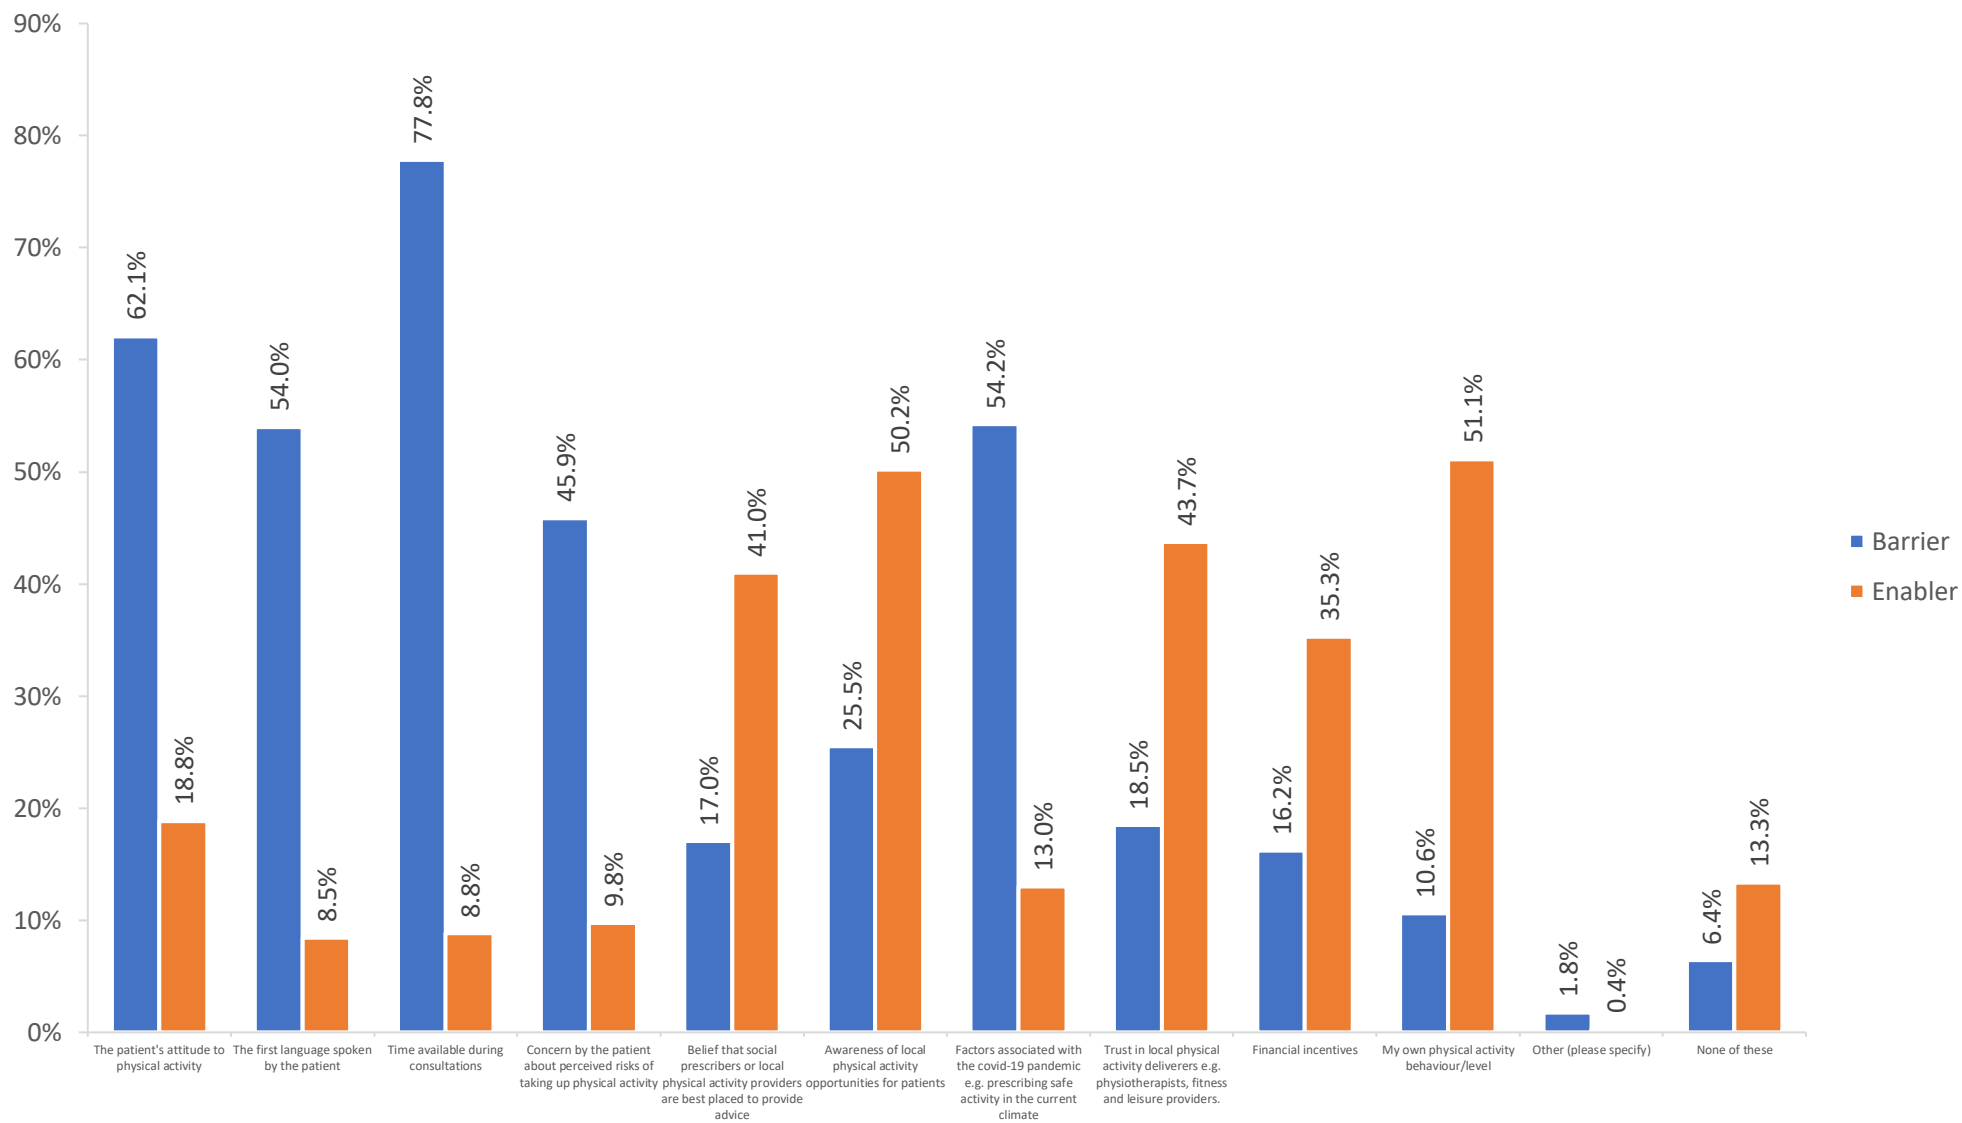

**Figure S4. GPs barriers and enablers to promoting PA to patients.**

**Survey question: What factors (if any) would encourage you or act as barrier to effectively advising patients about physical activity?**

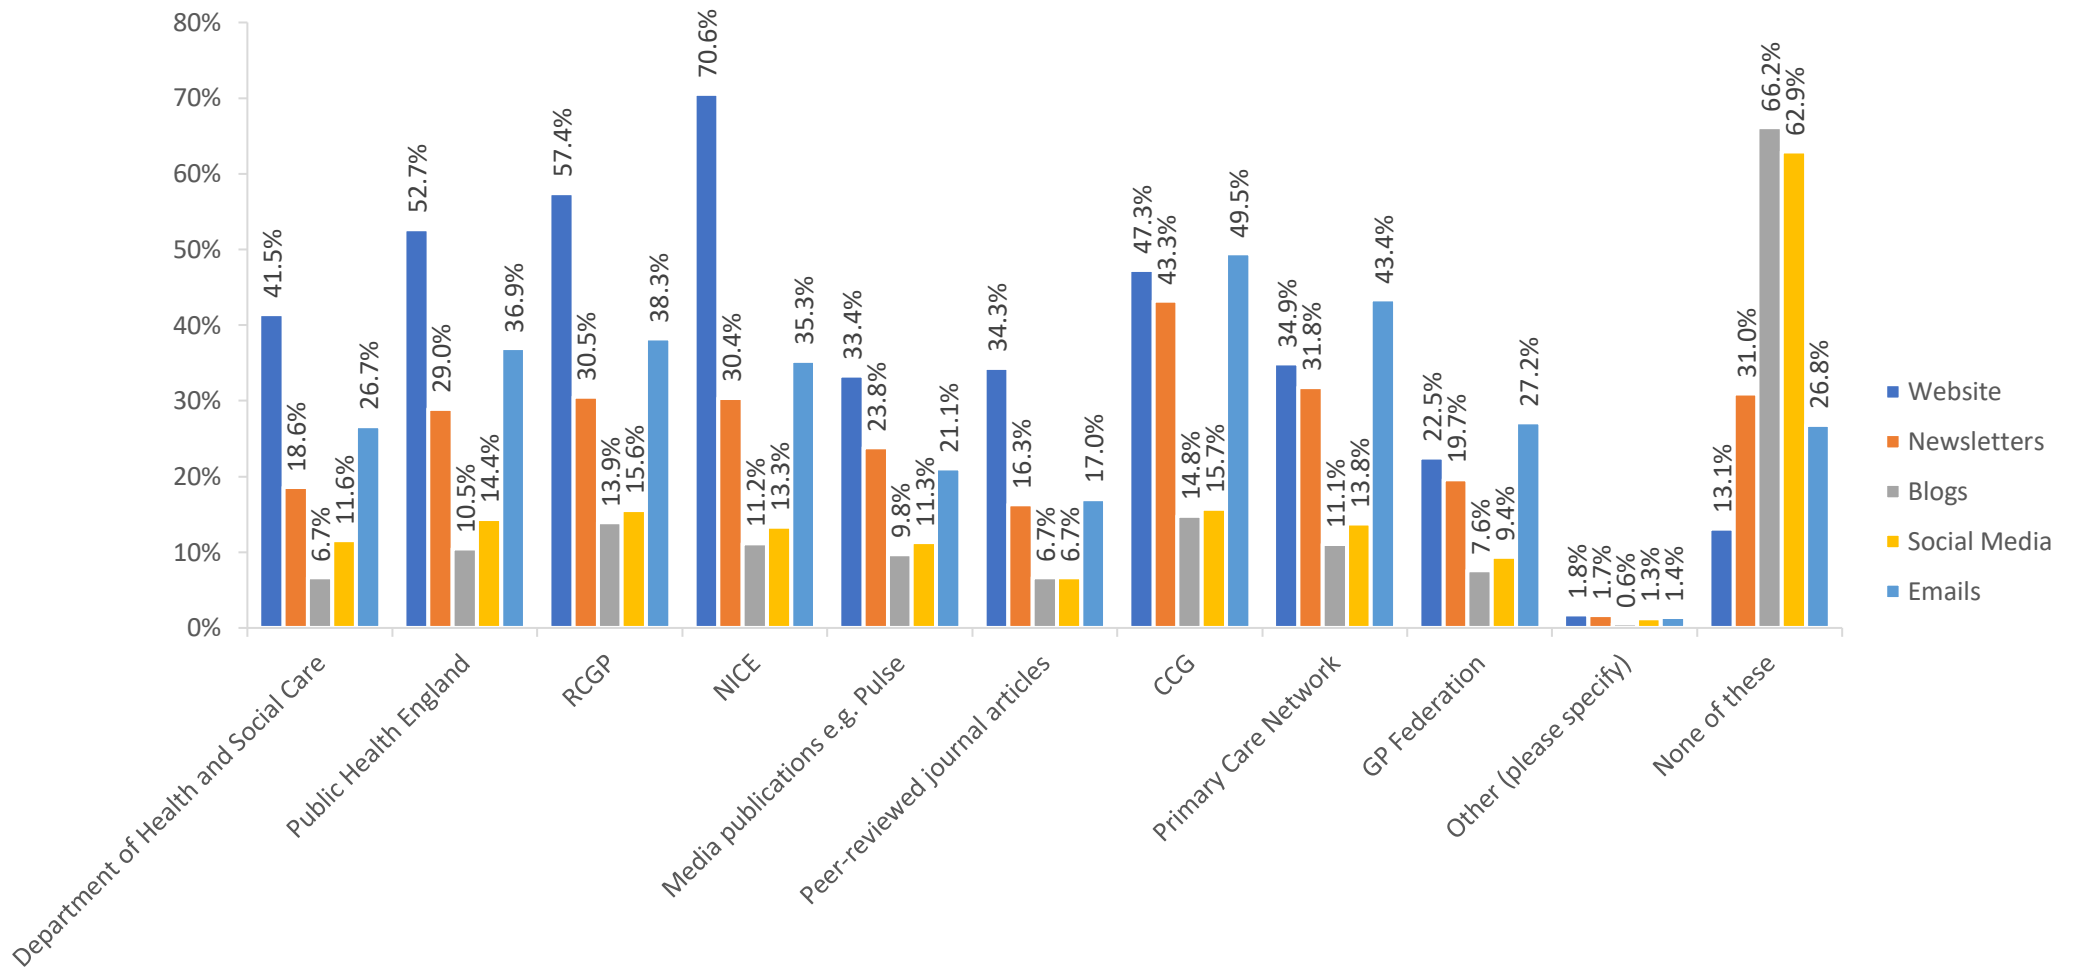

**Figure S5. Trusted sources of information among GPs.**

**Survey question: Which of the following do you see as trusted sources of information that you are likely to respond to?**
